# Supplementary material for: Decadal Transition of Summertime PM 2.5 -O 3 Coupling and Secondary Organic Aerosol Dominance in Northwest China
Source: Copernicus journal article supplement (doi:10.5194/egusphere-2025-5901), 2025-12-04
Supplement: Supplementary file 1 [file egusphere-2025-5901-supplement.pdf]

## **Decadal Transition of Summertime PM<sub>2.5</sub>-O<sub>3</sub> Coupling and Secondary Organic Aerosol Dominance in Northwest China**

5 Wei Zhou<sup>1</sup>, Liu Yang<sup>1,2</sup>, Siqi Zeng<sup>1,2</sup>, Yunping Kan<sup>1,2</sup>, Lirong Yang<sup>3</sup>, Weihong Zhang<sup>3</sup>, Weijie Wang<sup>3</sup>,  
Zijun Zhang<sup>1,2</sup>, Yan Li<sup>1</sup>, Weiqi Xu<sup>1</sup>, Yucheng Gu<sup>3</sup>, Yaozong, Wang<sup>3</sup>, Zhengyan, Zuo<sup>3</sup>, Jie Li<sup>1</sup>, Zifa Wang<sup>1,2</sup>,  
Yele Sun<sup>1,2</sup>

<sup>1</sup>State Key Laboratory of Atmospheric Environment and Extreme Meteorology, Institute of Atmospheric Physics,  
Chinese Academy of Sciences, Beijing, 100029, China

<sup>2</sup>College of Earth and Planetary Sciences, University of Chinese Academy of Sciences, Beijing, 100049, China

10 <sup>3</sup>Ningxia Hui Autonomous Region Ecological Environment Monitoring Center, Yinchuan, 750000, China

*Correspondence to:* Wei Zhou (zhouwei215@mails.ucas.ac.cn) and Jie Li (lijie8074@mail.iap.ac.cn)

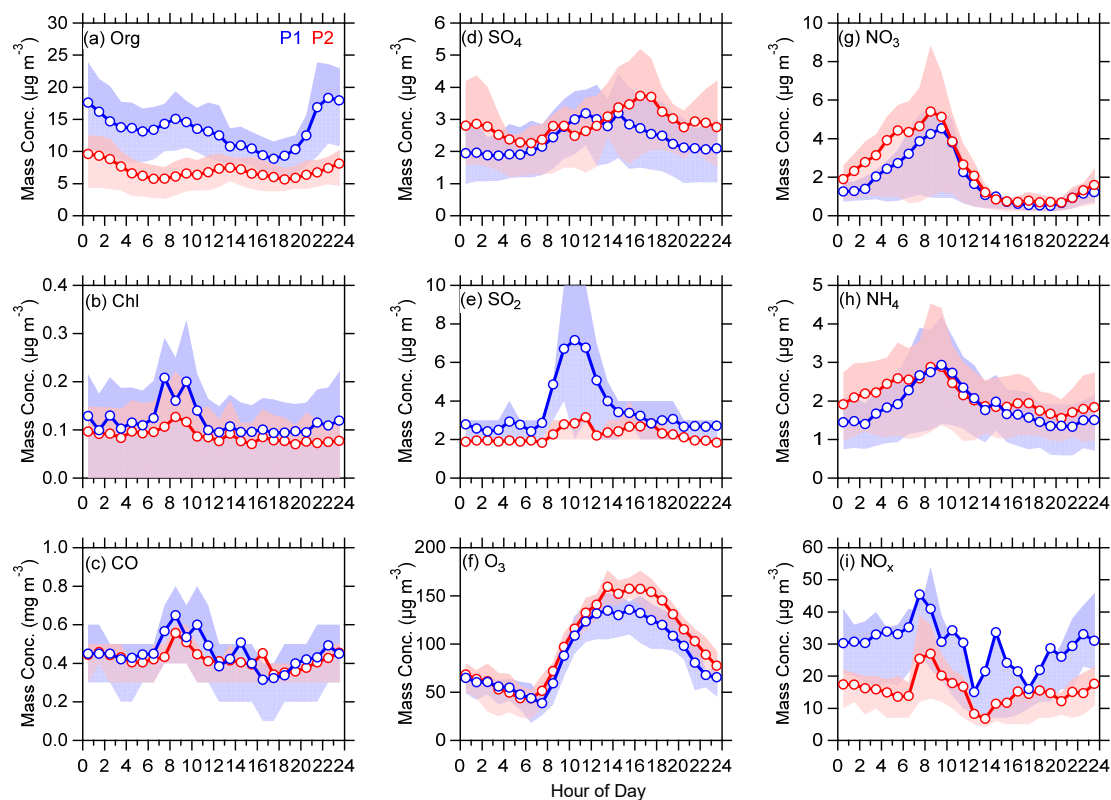

**Figure S1: Diurnal variations of the chemical compositions of NR-PM<sub>2.5</sub> (Org, SO<sub>4</sub>, NO<sub>3</sub>, NH<sub>4</sub>, Chl) and gaseous species (SO<sub>2</sub>, CO, O<sub>3</sub>, NO<sub>x</sub>) during P1 and P2, respectively. The circles indicate the mean values, and the shaded areas represent the 75<sup>th</sup> and 25<sup>th</sup> percentiles.**

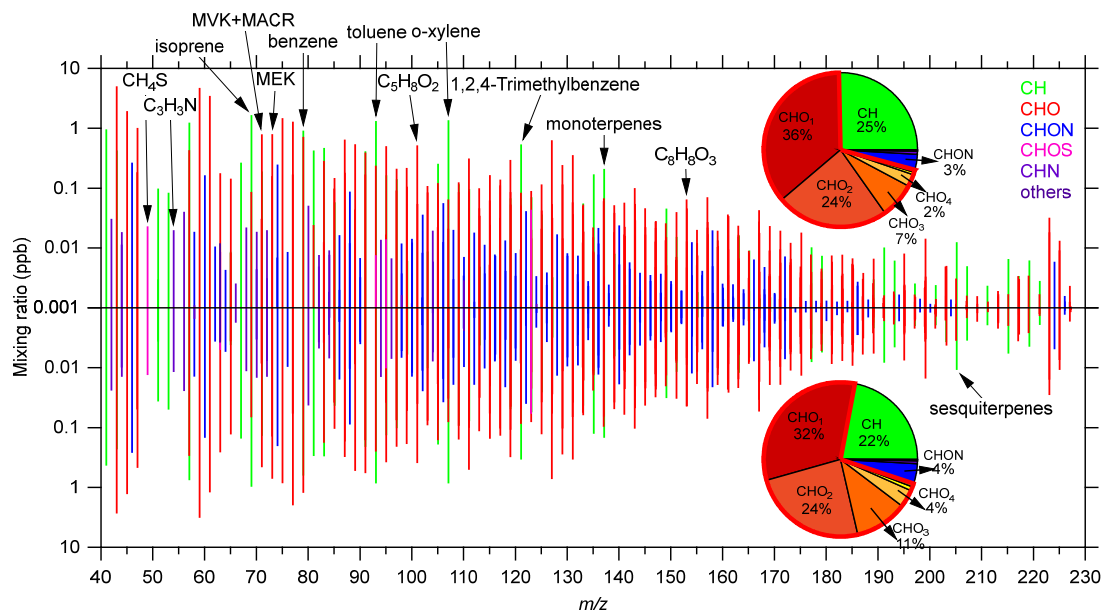

**Figure S2: Average mass spectrum of Vocus PTR-MS during P1 (upper panel) and P2 (lower panel). The pie charts refer to the mass contributions of different categories.**

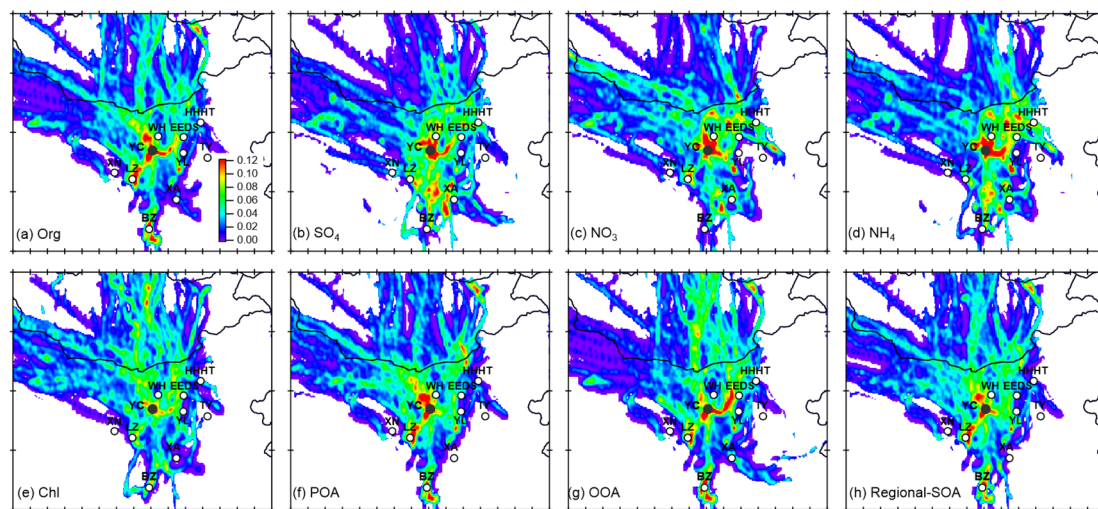

**Figure S3: Potential source contribution function of NR-PM<sub>2.5</sub> compositions and OA factors during this campaign in Ningxia. The color scales indicate the values of PSCEF. The city marked as a solid circle in each panel is Yinchuan (YL), and hollow circles refer to Xi'an (XA), Lanzhou (LZ), Xining (XN), Taiyuan (TY), WH (Wuhai), Yulin (YL), Eerdos (EEDS) and Hohhot (HHHT).**
